# Supplementary material for: Elucidation of the enigmatic IgD class-switch recombination via germline deletion of the IgH 3′ regulatory region
Source: PubMed Central journal article supplement — J Exp Med. 2014 May 5;211(5):975–85. doi: 10.1084/jem.20131385 (PMC4010897; doi:10.1084/jem.20131385), 2014-05-05
Supplement: supp_jem.20131385_JEM_20131385_sm.pdf [file supp_jem.20131385_JEM_20131385_sm.pdf]

SUPPLEMENTAL MATERIAL

Rouaud et al., <http://www.jem.org/cgi/content/full/jem.20131385/DC1>

Table S1 starts on next page.

Table S1.  $S_{\mu}-\sigma_{\delta}$ ,  $S_{\mu}-S_{\gamma,1}$  and  $S_{\mu}-S_{\gamma,3}$  junctions

| Sequence                                                                                            | Junction                                          |
|-----------------------------------------------------------------------------------------------------|---------------------------------------------------|
| <b><math>S_{\mu}-\sigma_{\delta}</math> junctions in <i>Wt</i> mice</b>                             |                                                   |
| <u>GCCCTAGTAAGCGAGGCTCTAAAAAGCA</u>                                                                 | $S_{\mu}$                                         |
| <u>GCCCTAGTAAGCGAGGCTCTAAAAAGCAAGCTCTGCTCTGTCCCCAGCCC</u><br><u>AGCAAGCTCTGCTCTGTCCCCAGCCC</u>      | #1 Short homology (1-5 bp)<br>$\sigma_{\delta}$   |
| <u>TGGAGTAGCTGAGATGGGGTGAGATGG</u>                                                                  | $S_{\mu}$                                         |
| <u>TGGAGTTGCTGAGATGGGGTGAGAAAGGAAAGAGTAGTGCAGACAGAACC</u><br><u>TGAGAAGGAAGAGTAGTGCAGACAGAACC</u>   | #2 Short homology (>5 bp)<br>$\sigma_{\delta}$    |
| <u>TGAGCTGGGGTGAGCTGGGCTG</u>                                                                       | $S_{\mu}$                                         |
| <u>TGAGCTGGGGTGAGCTGGGGTGGCTGTTCTGTTAGAGTCACAAAAGAAT</u><br><u>TGGCTGTTCTGTTAGAGTCACAAAAGAAT</u>    | #3 Short homology (1-5 bp)<br>$\sigma_{\delta}$   |
| <u>GTGGGCTTCTCTGAGCGCTTCTAA</u>                                                                     | $S_{\mu}$                                         |
| <u>GTGGGCTTCTCTGAGCGCTTCTCA...CAGAGTGCTCAGGGGGCTATGAG</u><br><u>CAAGCTGCTCAGGGGGCTATGAA</u>         | #4 Large insertion (304 bp)<br>$\sigma_{\delta}$  |
| <u>GTGGGCTTCTCTGAGCGCTTCTAAAAAT</u>                                                                 | $S_{\mu}$                                         |
| <u>GTGGGCTTCTCTGAGCGCTTCTAAGAT...CAGAGTGCTCAGGGGGCTAT</u><br><u>CAAGCTGCTCAGGGGGCTAT</u>            | #5 Large insertion (301 bp)<br>$\sigma_{\delta}$  |
| <u>CACAGTAATGACCCAGACAGAGA</u>                                                                      | $S_{\mu}$                                         |
| <u>CACAGTAATGACCCAGACAGAGA...GAATGTTGGTTTTAGCAAGCAAGT</u><br><u>GAATGTTGGTTTTAGCAAGCAAGT</u>        | #6 Large insertion (465 bp)<br>$\sigma_{\delta}$  |
| <u>CAGGTCGGCTGGACTAACTATCC</u>                                                                      | $S_{\mu}$                                         |
| <u>CAGGTCGGCTGGACTAACTATCCCAGAACCTGAGAAGGAAGAGTAGTGCA</u><br><u>TCCCAGAACCTGAGAAGGAAGAGTAGTGCA</u>  | #7 Short homology (1-5 bp)<br>$\sigma_{\delta}$   |
| <u>TGGAGTGAGCTGAGCTGGGCTGA</u>                                                                      | $S_{\mu}$                                         |
| <u>TGGAGTGAGCTGAGCTGGGCTGACTCTGGCAAGAAGAGTGATACTGTCCA</u><br><u>TGACTCTGGCAAGAAGAGTGATACTGTCCA</u>  | #8 Short homology (1-5 bp)<br>$\sigma_{\delta}$   |
| <u>GGGCTTCTCTGAGCGCTTCTAAAAAT</u>                                                                   | $S_{\mu}$                                         |
| <u>GGGCTTCTCTGAGCGCTTCTAAAAATTATCCCAAAGCTCTGAGGCCATAGC</u><br><u>TTATCCCAAAGCTCTGAGGCCATAGC</u>     | #9 Short homology (1-5 bp)<br>$\sigma_{\delta}$   |
| <u>GAGCGCTTCTAAAAATGCGCTAAACT</u>                                                                   | $S_{\mu}$                                         |
| <u>GAGCGCTTCTAAAAATGCGCTAAACT...GCTGGTATATGACATAGGGTAT</u><br><u>GCTGGTATATGACATAGGGTAT</u>         | #10 Large insertion (241 bp)<br>$\sigma_{\delta}$ |
| <u>AATGACCCAGACAGAGAAGGCCAG</u>                                                                     | $S_{\mu}$                                         |
| <u>AATGACCCAGACAGAGAAGGCCAG...GACAGATTCTCCCTGCTGCACAG</u><br><u>GACAGATTCTCCCTGCTGCACAG</u>         | #11 Large insertion (56 bp)<br>$\sigma_{\delta}$  |
| <u>GCTAAACTGAGGTGATTACTCTGA</u>                                                                     | $S_{\mu}$                                         |
| <u>GCTAAACTGAGGTGATTACTCTGACTTGGGGAAAAGGAGTCAGGCTGCTCT</u><br><u>TGACTTGGGGAAAAGGAGTCAGGCTGCTCT</u> | #12 Short homology (1-5 bp)<br>$\sigma_{\delta}$  |
| <u>TGGGTGGGCTTCTCTGAGCGCTTCT</u>                                                                    | $S_{\mu}$                                         |
| <u>TGGGTGGGCTTCTCTGAGCGCTTCT...TGCTCAGGGGGCTATGAGAATA</u><br><u>TGCTCAGGGGGCTATGAGAATA</u>          | #13 Large insertion (311 bp)<br>$\sigma_{\delta}$ |
| <u>AAACTGGAATGAACTTCATTAATCTAGGTTGAA</u>                                                            | $S_{\mu}$                                         |
| <u>AAACTGGAATGAACTTCATTAATCTAGGTTGAAAAGATAAACCTGGGCTG</u><br><u>TGAAAAGATAAACCTGGGCTG</u>           | #14 Short homology (1-5 bp)<br>$\sigma_{\delta}$  |
| <u>CCTAAATGAAGTAGACTGTAATGAA</u>                                                                    | $S_{\mu}$                                         |
| <u>CCTAAATGAAGTAGACTGTAATGAATGATAAAAAGGAACCTGACATGTTT</u><br><u>TGATAAAAAGGAACCTGACATGTTT</u>       | #15 Perfectly matched<br>$\sigma_{\delta}$        |

| Sequence                                                                            | Junction                    |
|-------------------------------------------------------------------------------------|-----------------------------|
| <u>CTATGCTACGCTGTGTTGGGGTGAG</u>                                                    | S $\mu$                     |
| CTATGCTACGCTGTGTTGGGGTGAG <u>GACATTGAAAATATTTGATATCCCA</u>                          | #16 Short homology (1-5 bp) |
| <u>GACATTGAAAATATTTGATATCCCA</u>                                                    | $\sigma\delta$              |
| <u>AAAAAGCATGGCTGAGCTGAGATGG</u>                                                    | S $\mu$                     |
| AAAAAGCATGGCTGAGCTGAGATGG <u>TACAAGCTGCTCAGGGGGCTATGAG</u>                          | #17 Short homology (>5 bp)  |
| <u>AGATGATAACAAGCTGCTCAGGGGGCTATGAG</u>                                             | $\sigma\delta$              |
| <u>GCTTAACCGAGATGAGCCAAACTGG</u>                                                    | S $\mu$                     |
| GCTTAACCGAGATGAGCCAAACTGGTGTCCAGACCTCACCTTTGTCCCCA                                  | #18 Perfectly matched       |
| <u>TGTCCAGACCTCACCTTTGTCCCCA</u>                                                    | $\sigma\delta$              |
| <u>TCATTAATCTAGGTTGAATAGAGCT</u>                                                    | S $\mu$                     |
| TCATTAATCTAGGTTGAATAGAGCTTTAAGGCCCTTCTCCCCTGTCTTCT                                  | #19 Short homology (>5 bp)  |
| <u>ATAGGGCTTTAAGGCCCTTCTCCCCTGTCTTCT</u>                                            | $\sigma\delta$              |
| <u>GTGAGGTGATCTGAAATGAGCTACT</u>                                                    | S $\mu$                     |
| GTGAGGTGATCTGAAATGAGCTACTGCCATAGGTGGCACTTTGCCCCAGC                                  | #20 Short homology (1-5 bp) |
| <u>CTGCCATAGGTGGCACTTTGCCCCAGC</u>                                                  | $\sigma\delta$              |
| <u>GGGGTGAAGCTGAGCTGAGCTGGGGT</u>                                                   | S $\mu$                     |
| GGGGTGAAGCTGAGCTGAGCTGGGGT--GACAAAGATGATGGTGACAGAGA                                 | #21 Short homology (1-5 bp) |
| <u>GGGGTTTCAGACAAAGATGATGGTGACAGA</u>                                               | $\sigma\delta$              |
| <b>S<math>\mu</math>-<math>\sigma\delta</math> junctions in 3'RR-deficient mice</b> |                             |
| <u>CTGGGCTGAGCTGGGGTGAG</u>                                                         | S $\mu$                     |
| CTGGGCTGAGCTGGGGTGAGTGATACTGTCCAGACCTCACCTTTGTCCCC                                  | #1 Short homology (1-5 bp)  |
| <u>GAGTGATACTGTCCAGACCTCACCTTTGTCCCC</u>                                            | $\sigma\delta$              |
| <u>CACAGTAATGACCCAGACAGAGA</u>                                                      | S $\mu$                     |
| CACAGTAATGACCCAGACAGAGA...TGAATGTTGGTTTCAGCAAGCAAA                                  | #2 Large insertion (464 bp) |
| <u>TGAATGTTGGTTTCAGCAAGCAAA</u>                                                     | $\sigma\delta$              |
| <u>GCGCTAAACTGAGGTGATTACTCTGA</u>                                                   | S $\mu$                     |
| GCGCTAAACTGAGGTGATTACTCTGACTTGGGGAAAAGGAGTCAGGCTGCT                                 | #3 Short homology (1-5 bp)  |
| <u>TGACTTGGGGAAAAGGAGTCAGGCTGCT</u>                                                 | $\sigma\delta$              |
| <u>CTCAGCTATGCTACGCTGTGTTGGG</u>                                                    | S $\mu$                     |
| CTCAGCTATGCTACGCTGTGTTGGGCCAGACTCCTGGCCTCTAGAACAGG                                  | #4 Perfectly matched        |
| <u>CCAGACTCCTGGCCTCTAGAACAGG</u>                                                    | $\sigma\delta$              |
| <u>CAGTAATGACCCAGACAGAGA</u>                                                        | S $\mu$                     |
| CAGTAATGACCCAGACAGAGA...ATGTTGGTTTCAGCAAGCAAGTCTGG                                  | #5 Large insertion (467 bp) |
| <u>ATGTTGGTTTCAGCAAGCAAGTCTGG</u>                                                   | $\sigma\delta$              |
| <u>GCCAGACTCATAAAGCTTGCTGAGC</u>                                                    | S $\mu$                     |
| GCCAGACTCATAAAGCTTGCTGAGCCTCTAGAACAGGGAAAAGAACAGAAT                                 | #6 Short homology (1-5 bp)  |
| <u>GCCTCTAGAACAGGGAAAAGAACAGAAT</u>                                                 | $\sigma\delta$              |
| <u>AGCCACAGTAATGACCCAGACAGAGA</u>                                                   | S $\mu$                     |
| AGCCACAGTAATGACCCAGACAGAGA...GAATGTTGGTTTCAGCAAGCA                                  | #7 Large insertion (465 bp) |
| <u>GAATGTTGGTTTCAGCAAGCA</u>                                                        | $\sigma\delta$              |
| <u>AGATGAGCCAAACTGGAATGAACTTC</u>                                                   | S $\mu$                     |
| AGATGAGCCAAACTGGAATGAACTTCAGAGAAGTGTGGGCCACAGCAAGCT                                 | #8 Short homology (1-5 bp)  |
| <u>CCAGAAGTGTGGGCCACAGCAAGCT</u>                                                    | $\sigma\delta$              |

| Sequence                                                                                                                          | Junction                                 |
|-----------------------------------------------------------------------------------------------------------------------------------|------------------------------------------|
| <u>GGGTGAGCTGAGCTGGGTGAGCTGAGCT</u><br>GGGTGAGCTGAGCTGGGTGAGCTGAGCTGTGATACTGTCCAGACCTCACC<br><u>GTGATACTGTCCAGACCTCACC</u>        | Sμ<br>#9 Perfectly matched<br>σδ         |
| <u>ACTTCATTAATCTAGGTTGA</u><br>ACTTCATTAATCTAGGTTGAGAACATTTTTTTTTTTGGGACTGAGTCATTTT<br><u>TTGGGACTGAGTCATTTT</u>                  | Sμ<br>#10 Large insertion (11 bp)<br>σδ  |
| <u>TAAACTCTACTGCCTACACTGGACT</u><br>TAAACTCTACTGACTACACTGGACTCTGGAATTGGATGATGAACCTGAC<br><u>GACTCTGGAATTGGATGATGAACCTGAC</u>      | Sμ<br>#11 Short homology (1-5 bp)<br>σδ  |
| <u>TGGAATGAACTTCATTAATCTAGG</u><br>TGGAATGAACTTCATTAATCTAGGGACATTGAAAATATTTGATATCCCAG<br><u>GGGACATTGAAAATATTTGATATCCCAG</u>      | Sμ<br>#12 Short homology (1-5 bp)<br>σδ  |
| <u>GATGGGTGGGCTTCTCTGAGCGCTTCT</u><br>GATGGGTGGGCTTCTCTGAGCGCTTCT...TGCTCAGGGGGCTATGAGAA<br><u>TGCTCAGGGGGCTATGAGAA</u>           | Sμ<br>#13 Large insertion (311 bp)<br>σδ |
| <u>AACTCTCCAGCCACAGTAATGACCCAG</u><br>AACTCTCCAGCCACAGTAATGACCCAGTCTGGCGGGGGGGGGTGTCA<br><u>AGTCTGGCGGGGGGGGGTGTCA</u>            | Sμ<br>#14 Short homology (1-5 bp)<br>σδ  |
| <u>CTGGGCTTGAGCCAAAATGAAGTAG</u><br>CTGGGCTTGAGCCAAAATGAAGTAGCTGAGATGTTGGTTTTAGCAAGCAA<br><u>CATGAATGTTGGTTTTAGCAAGCAA</u>        | Sμ<br>#15 Perfectly matched<br>σδ        |
| <u>GTTGAGAGCCCTAGTAAGCGAGGCTCT</u><br>GTTGAGAGCCCTAGTAAGCT--GCTCTGCTCAGATGATAACAAGCTGCTCA<br><u>GCTCTGCTCAGATGATAACAAGCTGCTCA</u> | Sμ<br>#16 Short homology (1-5 bp)<br>σδ  |
| <u>GTTGAGAGCCCTAGTAAGCGAGGCTCT</u><br>GTTGAGAGCCCTAGTAAGCGAGGC-CTCTCTTGTCTCTGGGATACTGT<br><u>CTTTTGTCTCTCTGGGATACTGT</u>          | Sμ<br>#17 Short homology (1-5 bp)<br>σδ  |
| <u>AGCTGGGGTGAGCTGAGCTGAGC</u><br>AGCTGGGGTGAGCTGAGCTGAGC...TCACCTTTGTCCCAGTTCCATGT<br><u>TCACCTTTGTCCCAGTTCCATGT</u>             | Sμ<br>#18 Large insertion (299 bp)<br>σδ |
| <u>AGCTAGGGTGAGCTGAGCTG</u><br>AGCTAGGGTGAGCTGAGCTGAGAAGAGTAGGAGGTAGATCTCTTCCCTAAG<br><u>AGAAGAGTAGGAGGTAGATCTCTTCCCTAAG</u>      | Sμ<br>#19 Perfectly matched<br>σδ        |
| <u>GGCTGAGCTGGGGTGAGCTGAGC</u><br>GGCTGAGCTGGGGTGAGCTGAGC...TGATGTCACCTTTGTCCCAGTTC<br><u>AGACCTCACCTTTGTCCCAGTTC</u>             | Sμ<br>#20 Large insertion (129 bp)<br>σδ |
| <u>TTCTAAAATGCGCTAAACTGAGGTGATT</u><br>TTCTAAAATGCGCTAAACTGAGGTGATTGATGCCAACCCCTGATTCAGCAC<br><u>TTGATGCCAACCCCTGATTCAGCAC</u>    | Sμ<br>#21 Short homology (1-5 bp)<br>σδ  |
| <u>GGGCTGAGCTGGGGTGAGCTGGGCTG</u><br>GGGCTGAGCTGGGGTGAGCTGGGGTGGCTGTTCTGTTAGAGTCACAAAA<br><u>GGCTGGCTGTTCTGTTAGAGTCACAAAA</u>     | Sμ<br>#22 Short homology (1-5 bp)<br>σδ  |
| <u>GCTAAGCTAAACTAGGCTGGCTTA</u><br>GCTAAGCTAAACTAGGCTGGCTTA...AGAACCTGAGAAGGAAGAGTAGT<br><u>AGAACCTGAGAAGGAAGAGTAGT</u>           | Sμ<br>#23 Large insertion (159 bp)<br>σδ |
| <u>AGGTTGAATAGAGCTAAACTCTA</u><br>AGGTTGAATAGAGCTAAACTCTA...GAGAAGGAAGAGTAGTGCAGACAG<br><u>GAGAAGGAAGAGTAGTGCAGACAG</u>           | Sμ<br>#24 Large insertion (250 bp)<br>σδ |



| Sequence                                                                                                                                  | Junction                                                         |
|-------------------------------------------------------------------------------------------------------------------------------------------|------------------------------------------------------------------|
| <u>AGAGAAAGCCAGACTCATAAAGCTT</u><br>AGAGAAAGCCAGACTCATAAAGCTT <u>ACAGGTGAGCTGGGGTAGGAGGGAG</u><br><u>TATAGGTGAGCTGGGGTAGGAGGGAG</u>       | S <sub>μ</sub><br>#3 Short homology (1-5 bp)<br>S <sub>γ3</sub>  |
| <u>CCACAGTAATGACCCAGACAGAGAA</u><br>CCACAGTAATGACCCAGACAGAGAACTGGGGTAGGAGGGAGTATGAGGAC<br><u>CTGGGGTAGGAGGGAGTATGAGGAC</u>                | S <sub>μ</sub><br>#4 Perfectly matched<br>S <sub>γ3</sub>        |
| <u>CCCAGACAGAGAAGGCCAGACTC</u><br>CCCAGACAGAGAAGGCCAGACTC...CTACAGGTGAGCTGGGTTGGATGA<br><u>CTACAGGTGAGCTGGGTTGGATGA</u>                   | S <sub>μ</sub><br>#5 Large insertion (19 bp)<br>S <sub>γ3</sub>  |
| <u>ACAGTAATGACCCAGACAGAGAAGGCCA</u><br>ACAGTAATGACCCAGACAGAGAAAGCCAC <u>GATGGAAATGTGAATAACCTG</u><br><u>GATGGAAATGTGAATAACCTG</u>         | S <sub>μ</sub><br>#6 Insertion (1 bp)<br>S <sub>γ3</sub>         |
| <u>GCCCTAGTAAGCGAGGCTCTAAAAA</u><br>GCCCTAGTAAGCGAGGCTCTAAAAACGAGTATGAGGACTAGGTTGGGCAG<br><u>GAGTATGAGGACTAGGTTGGGCAG</u>                 | S <sub>μ</sub><br>#7 Insertion (1 bp)<br>S <sub>γ3</sub>         |
| <u>AAGGGAACAAGGTTGAGAGCCCTA</u><br>AAGGGAACAAGGTTGAGAGCCCTACCAGGATAAGTGGGAGTATGGAGACC<br><u>CCGGGGTAAGTGGGAATATGGAGACC</u>                | S <sub>μ</sub><br>#8 Perfectly matched<br>S <sub>γ3</sub>        |
| <u>GGGAACAAGGTTGAGAGCCCTAGTA</u><br>GGGAACAAGGTTGAGAGCCCTAGTATAGGATATTAAGCTGAGCAGCTACA<br><u>TAGGATATTAAGCTGAGCAGCTACA</u>                | S <sub>μ</sub><br>#9 Perfectly matched<br>S <sub>γ3</sub>        |
| <u>GAGCTGAGATGAGCTGGGGTGAGCTCA</u><br>GAGCTGAGATGAGCTGGGGTGAGCTC <u>ATCACAGGGTCCCAGGTTATGCAG</u><br><u>ATCACAGGGTCCCAGGTTATGCAG</u>       | S <sub>μ</sub><br>#10 Short homology (1-5 bp)<br>S <sub>γ3</sub> |
| <u>GAATGAGCTGGGCCACTAAGCTAA</u><br>GAATGAGCTGGGCCACTAAGCTAA...TGGGGTAGGAGGGAGTATGAGGA<br><u>TGGGGTAGGAGGGAGTATGAGGA</u>                   | S <sub>μ</sub><br>#11 Large insertion (29 bp)<br>S <sub>γ3</sub> |
| <u>GAACTGGAATGAGCTGGGCCGCTAAGCTAAA</u><br>GAACTGGAATGAGCTGGGCCGCTAAGCTA <u>CAGGTGAGCTGGGTTGGATGG</u><br><u>AGCTAAAGGTGAGCTGGGTTAGATGG</u> | S <sub>μ</sub><br>#12 Short homology (>5 bp)<br>S <sub>γ3</sub>  |
| <u>GAACTGGAATGAGCTGGGCCGCTAA</u><br>GAACTGGAATGAGCTGGGCCGCTAAAGCTACAGGTGAGCTGGGTTGGATG<br><u>AGCTACAGGTGAGCTGGGTTGGATG</u>                | S <sub>μ</sub><br>#13 Perfectly matched<br>S <sub>γ3</sub>       |
| <u>GGCTTGAGCCAAAATGAAGTAGACTGTA</u><br>GGCTTGAGCCAAAATGAAGTAGACT <u>ATACTAGGTTGGGCAGCTACAGGTG</u><br><u>ACTAGGTTGGGCAGCTACAGGTG</u>       | S <sub>μ</sub><br>#14 Short homology (1-5 bp)<br>S <sub>γ3</sub> |
| <u>GCTTGAGCCAAAATGAAGTAGACTG</u><br>GCTTGAGCCAAAATGAAGTACACT <u>GGTGAGCTGGGTTGGATGGAAATGTG</u><br><u>GGTGAGCTGGGTTGGATGGAAATGTG</u>       | S <sub>μ</sub><br>#15 Short homology (1-5 bp)<br>S <sub>γ3</sub> |
| <u>GACTGTAATGAACTGGAATGAGCTG</u><br>GACTGTAATGAACTGGAATGAGCT <u>GTGAGCTGGGGTAGGAGGGAGTATGA</u><br><u>GTGAGCTGGGGTAGGAGGGAGTATGA</u>       | S <sub>μ</sub><br>#16 Short homology (1-5 bp)<br>S <sub>γ3</sub> |
| <u>CGCTAAACTGAGGTGATTACTCTG</u><br>CGCTAAACTGAGGTGATTACTCTGGAGACCTGGCTGGGGAGCTGAGGTAG<br><u>TGGAGACCTGGCTGGGGAGCTGAGGTAG</u>              | S <sub>μ</sub><br>#17 Short homology (1-5 bp)<br>S <sub>γ3</sub> |
| <u>TCTGAGGTAAGCAAAGCTGGGCTTG</u><br>TCTGAGGTAAGCAAAGCTGGGCTTG <u>CAGCTGGGGTAGGAGGGAGTATGAG</u><br><u>AGCTGGGGTAGGAGGGAGTATGAG</u>         | S <sub>μ</sub><br>#18 Insertion (1 bp)<br>S <sub>γ3</sub>        |

| Sequence                                                                                                                               | Junction                                                          |
|----------------------------------------------------------------------------------------------------------------------------------------|-------------------------------------------------------------------|
| <u>AAAAGCATGGCTGAGCTGAGATGGGTGG</u><br>AAAAGCATGGCTGAGCTGAGATGGG <u>GGGTGGGTGGGGTTGTGAGGACCAG</u><br><u>GGGGTGGGTGGGGTTGTGAGGACCAG</u> | S <sub>μ</sub><br>#19 Short homology (1-5 bp)<br>S <sub>γ3</sub>  |
| <u>TAGACTGTAATGAACTGGAATGAGC</u><br>TAGACTGTAATGAACTGGAATGAGC <u>CGTATCAGATCACAGGGTCCCAGG</u><br><u>GCTATCAGATCACAGGGTCCCAGG</u>       | S <sub>μ</sub><br>#20 Insertion (1 bp)<br>S <sub>γ3</sub>         |
| <u>GAGATGGGTGGGCTTCTCTGAGC</u><br>GAGATGGGTGGGCTTCTCTGAGC. . . <u>GAGCTGGGTGGATGGAAATGTGA</u><br><u>GAGCTGGGTGGATGGAAATGTGA</u>        | S <sub>μ</sub><br>#21 Large insertion (92 bp)<br>S <sub>γ3</sub>  |
| <u>AAACTGAGGTGATTACTCTGAGGTA</u><br>AAACTGAGGTGATTACTCTGAGGTA <u>AGGGGAGCTGGGCCTATCAGATCACA</u><br><u>AGGGGAGCTGGGGCTATCAGATCACA</u>   | S <sub>μ</sub><br>#22 Short homology (1-5 bp)<br>S <sub>γ3</sub>  |
| <u>TGAGTGCTTCTAAAATGCTCTAA</u><br>TGAGTGCTTCTAAAATGCTCTAA <u>TACAGGGTCCCAGGTTATGCAGCTCC</u><br><u>ATCAGGGTCCCAGGTTATGCAGCTCC</u>       | S <sub>μ</sub><br>#23 Short homology (1-5 bp)<br>S <sub>γ3</sub>  |
| <u>AAATGCGCTAAACTGAGGTGATTA</u><br>AAATGCGCTAAACTGAGGTGATTA <u>TGGGGCTATCAGATCACAGGGTCCC</u><br><u>TGGGGCTATCAGATCACAGGGTCCC</u>       | S <sub>μ</sub><br>#24 Insertion (1 bp)<br>S <sub>γ3</sub>         |
| <u>CTTCTCTGAGTGCTTCTAAAATGCGC</u><br>CTTCTCTGAGTGCTTCTAAAATGCGC <u>CAGATCACAGGGTCCCAGGTTATGC</u><br><u>CAGATCACAGGGTCCCAGGTTATGC</u>   | S <sub>μ</sub><br>#25 Short homology (1-5 bp)<br>S <sub>γ3</sub>  |
| <u>TGAGGTAAGCAAAGCTGGGCTTGAG</u><br>TGAGGTAAGCAAAGCTGGGCTT <u>GAGACCTGGCTGGGGAGCTGAGGTAGGT</u><br><u>GAGACCTGGCTGGGGAGCTGAGGTAGGT</u>  | S <sub>μ</sub><br>#26 Short homology (1-5 bp)<br>S <sub>γ3</sub>  |
| <u>ATGAAGTAGACTGTAATGAACTG</u><br>ATGAAGTAGACTGTAATGAACTGTAGGTTGGGCAGCTACAGGTGAGCTGG<br><u>TAGGTTGGGCAGCTACAGGTGAGCTGG</u>             | S <sub>μ</sub><br>#27 Perfectly matched<br>S <sub>γ3</sub>        |
| <u>AACTTCATTAATCTAGGTTGAATAG</u><br>AACTTCATTAATCTAGGTTGAATAGGAGGTGAGCTGGGTGGATGGAAAT<br><u>AGGTGAGCTGGGTGGATGGAAAT</u>                | S <sub>μ</sub><br>#28 Insertion (1 bp)<br>S <sub>γ3</sub>         |
| <u>AGCTGAGCTTGGCTGAGCTAGGGTG</u><br>AGCTGAGCTTGGCTGAGCTAGGGTGT <u>CACAGGGTCCCAGGTTATGCAGCT</u><br><u>TCACAGGGTCCCAGGTTATGCAGCT</u>     | S <sub>μ</sub><br>#29 Perfectly matched<br>S <sub>γ3</sub>        |
| <u>AGTAGCTGAGATGGGGTGAGCTG</u><br>AGTAGCTGAGATGGGGTGAGCTG. . . <u>TGAAGGGCCACAGGGGAGCTGGGG</u><br><u>TGAAGGGCCACAGGGGAGCTGGGG</u>      | S <sub>μ</sub><br>#30 Large insertion (118 bp)<br>S <sub>γ3</sub> |
| <u>CTGGAATGAACTTCATTAATCTAGG</u><br>CTGGAATGAACTTCATTAATCTAGG <u>ACTGGGGCTATCAGATCACAGGGTC</u><br><u>CTGGGGCTATCAGATCACAGGGTC</u>      | S <sub>μ</sub><br>#31 Insertion (1 bp)<br>S <sub>γ3</sub>         |
| <u>CTAGGCTGGCTTAACCGAGATGAGC</u><br>CTAGGCTGGCTTAACCGAGATGAGCGAGCTGGGTGGATGGAAATGTGAA<br><u>GAGCTGGGTGGATGGAAATGTGAA</u>               | S <sub>μ</sub><br>#32 Perfectly matched<br>S <sub>γ3</sub>        |
| <u>TGAGCCAAACTGGAATGAACTTCAT</u><br>TGAGCCAAACTGGAATGAACTTCATGGAATGTGAATAACCTGCCTGAAG<br><u>ATGGAAATGTGAATAACCTGCCTGAAG</u>            | S <sub>μ</sub><br>#33 Short homology (1-5 bp)<br>S <sub>γ3</sub>  |
| <u>TACACTGGACTGTTCTGAGCTGAGA</u><br>TACACTGGACTGTTCTGAGCTGAGAG <u>TCACAGGGTCCCAGGTTATGCAGC</u><br><u>TCACAGGGTCCCAGGTTATGCAGC</u>      | S <sub>μ</sub><br>#34 Insertion (1 bp)<br>S <sub>γ3</sub>         |





| Sequence                                                                                                                                 | Junction                                                         |
|------------------------------------------------------------------------------------------------------------------------------------------|------------------------------------------------------------------|
| <u>ATGAGCTGGGGTGAGCTCAGCTATG</u><br>ATGAGCTGGGGTGAGCTCAGCTATG <u>TACAGGTGAGCTGGGGTAGGAGGGA</u><br><u>AGGTGAGCTGGGGTAGGAGGGA</u>          | S <sub>μ</sub><br>#51 Insertion (3 bp)<br>S <sub>γ3</sub>        |
| <u>TTAATCTAGGTTGAATAGAGCTAAA</u><br>TTAATCTAGGTTGAATAGAGCTAAA <u>TAGGTGAGCCAGGGTAAGTGGGAGT</u><br><u>GGTGAGCCGGGGTAAGTGGGAGT</u>         | S <sub>μ</sub><br>#52 Insertion (2 bp)<br>S <sub>γ3</sub>        |
| <u>GCTGTGTTGGGGTGAGCTGATCTGA</u><br>GCTGTGTTGGGGTGAGCTGATCTGAGGTGAG <u>ATGGGGTAGGAGGGAGTAT</u><br><u>AGGTGAGCTGGGGTAGGAGGGAGTAT</u>      | S <sub>μ</sub><br>#53 Short homology (1-5 bp)<br>S <sub>γ3</sub> |
| <u>GAGCGCTTCTAAAATGCGCTAAACT</u><br>GAG <u>TGCTTCTAAAATGCGCTAAACT</u> <u>TAGATACAGGTGAGCTGGGTTAGATG</u><br><u>TACAGGTGAGCTGGGTTAGATG</u> | S <sub>μ</sub><br>#54 Insertion (3 bp)<br>S <sub>γ3</sub>        |
| <u>GAAATGAGATACTCTGGAGTAGCTG</u><br>GAAATGAGATACTCTGGAGTAGCTGGAGTATGAGGACTAGGTTGGGCAGC<br><u>GGAGTATGAGGACTAGGTTGGGCAGC</u>              | S <sub>μ</sub><br>#55 Short homology (1-5 bp)<br>S <sub>γ3</sub> |
| <u>TTCTGAGCTGAGATGAGCTGGGGT</u><br>TTCTGAGCTGAGATGAGCTGGGGTGGGAACATAGGGTATTAAGCTGAGCA<br><u>GGTGGGAACATAGGGTATTAAGCTGAGCA</u>            | S <sub>μ</sub><br>#56 Short homology (1-5 bp)<br>S <sub>γ3</sub> |
| <u>ACTGTTCTGAGCTGAGATGAGCT</u><br>ACTGTTCTGAGCTGAGATGA <u>ACTAAGTACAGGTGAGCCAGGGTAAGTGGG</u><br><u>TACAGGTGAGCCGGGGTAAGTGGG</u>          | S <sub>μ</sub><br>#57 Insertion (3 bp)<br>S <sub>γ3</sub>        |
| <u>AAATGAGCTACTCTGGAGTAGCTGA</u><br>AAATGAGCTACTCTGGAGTAGCTGATAATATGGAGACCTGGCTGGGGAGC<br><u>AATATGGAGACCTGGCTGGGGAGC</u>                | S <sub>μ</sub><br>#58 Insertion (1 bp)<br>S <sub>γ3</sub>        |
| <u>CTGAGCTGGGCTGAGCTGGACTGAG</u><br>CTGAGCTGGGCTGA <u>ACTAGACTGAGGTAGGTGGAAGCATAGGATATTAAG</u><br><u>CTGAGGTAGGTGGGAACATAGGGTATTAAG</u>  | S <sub>μ</sub><br>#59 Short homology (1-5 bp)<br>S <sub>γ3</sub> |
| <u>GTGAGATGGGGTGAGCTGAACTGGG</u><br>GTGAGATGGGGTGAGCTGAACTGGGTGAG <u>TCAGGGTAAGTGGGAGTATGG</u><br><u>GGTGAGCCGGGGTAAGTGGGAATATGG</u>     | S <sub>μ</sub><br>#60 Short homology (1-5 bp)<br>S <sub>γ3</sub> |
| <u>GAGCTGGGTGAGCTGAGCTAAGCTGG</u><br>GAGCTGGGTGAGCTGAGCTAATCTGGTGAGGTAGGTGG <u>AAGCATAGGATA</u><br><u>TGAGGTAGGTGGGAACATAGGGTA</u>       | S <sub>μ</sub><br>#61 Perfectly matched<br>S <sub>γ3</sub>       |
| <u>GGGCTGAGCTGGACCAAGCTGGGC</u><br>GGGCTGAGCTGGACCAAGCTGGGC . . . GAGGTAGGTGGAAGCATAGGATA<br><u>GAGGTAGGTGGAAGCATAGGATA</u>              | S <sub>μ</sub><br>#62 Large insertion (96 bp)<br>S <sub>γ3</sub> |
| <u>CTGAGATGAGCTGGGGTGAGCTCAG</u><br>CTGAGATGAGCTGGGGTGAGCTCAGGTGGAAGCATAGGATATTAAGCTGA<br><u>AGGTGGAAGCATAGGATATTAAGCTGA</u>             | S <sub>μ</sub><br>#63 Short homology (1-5 bp)<br>S <sub>γ3</sub> |
| <u>GCTGAGCTGGGTGAGCTGAGCTAAGCT</u><br>GCTGAGCTGGGTGAGCTGAGCTAAGCTACAGGTGAGCTGGGGTAGGAGGG<br><u>AGCTACAGGTGAGCTGGGGTAGGAGGG</u>           | S <sub>μ</sub><br>#64 Short homology (1-5 bp)<br>S <sub>γ3</sub> |
| <u>CTGGGGTGAGCTGAGCTGAGCTTG</u><br>CTGGGGTGAGCTGAGCTGAGCTTGCTGGACCAGGCTGGGCAGCTCTCAG<br><u>GGACCAGGCTGGGCAGCTCTCAG</u>                   | S <sub>μ</sub><br>#65 Insertion (3 bp)<br>S <sub>γ3</sub>        |
| <u>GGCTTCTCTGAGCGCTTCTAAAATGC</u><br>GGCTTCTCTGAGCGCTTCTAAAATGCTCAGGTTATGCAGCTCCTGGGTCA<br><u>CAGGTTATGCAGCTCCTGGGTCA</u>                | S <sub>μ</sub><br>#66 Insertion (1 bp)<br>S <sub>γ3</sub>        |

| Sequence                                                                                                                          | Junction                                                |
|-----------------------------------------------------------------------------------------------------------------------------------|---------------------------------------------------------|
| <u>GGGTGAGCTGAGCTAAGATGGGGTGAGC</u><br>GGGTGAGCTGAGCTAAGATGGGGTGAGCATGAGGTAGGTGGAAGCATAGG<br><u>GGTGAGCATGAGGTAGGTGGAAGCATAGG</u> | S $\mu$<br>#67 Short homology (>5 bp)<br>S $\gamma$ 3   |
| <u>CTGAGATGAGCTGGGGTGAGCTCA</u><br>CTGAGATGAGCTGGGGTGAGCTCA...TCACAGGGTCCCAGGTTATGCAG<br><u>TCACAGGGTCCCAGGTTATGCAG</u>           | S $\mu$<br>#68 Large insertion (205 bp)<br>S $\gamma$ 3 |
| <u>CCCTAGTAAGCGAGGCTCTAAAAA</u><br>CCCTAGTAAGCGAGGCTCTAAAAA...CAGGTACAGGTGAGCTGGGTTGG<br><u>CAGGTACAGGTGAGCTGGGTTGG</u>           | S $\mu$<br>#69 Large insertion (50 bp)<br>S $\gamma$ 3  |
| <b>S<math>\mu</math>-S<math>\gamma</math>1 junctions in <i>Wt</i> mice</b>                                                        |                                                         |
| <u>ATGACCCAGACAGAGAAGGCCAGAC</u><br>ATGACCCAGACAGAGAAGGCCAGACGACAGCTGAGCAAATACTACATAGC<br><u>AC-ACAGCTGAGCAAATACTACATAGC</u>      | S $\mu$<br>#1 Short homology (1-5 bp)<br>S $\gamma$ 1   |
| <u>AGGCCAGACTCATAAAGCTTGCTGA</u><br>AGGCCAGACTCATAAAGCTTGCTGA...TACAGAGAAGCTGAGGCAGGTA<br><u>TACAGGGAAGCTGAGGCAGGTA</u>           | S $\mu$<br>#2 Large insertion (126 bp)<br>S $\gamma$ 1  |
| <u>CCAGACTCATAAAGCTTGCTGAGCA</u><br>CCAGACTCATAAAGCTTGCTGAGCA...CTGAGGAGCTACCAAGGATCAG<br><u>CTGAGCAGCTACCAAGGATCAG</u>           | S $\mu$<br>#3 Large insertion (30 bp)<br>S $\gamma$ 1   |
| <u>CGAGGCTCTAAAAAGCATGGCTGAG</u><br>CGAGGCTCTAAAAAGCACAAGCTGAGATGCTGGCTACTCATAGGGAAGCTG<br><u>ATGCTGGGTACTCATAGGGAAGCTG</u>       | S $\mu$<br>#4 Perfectly matched<br>S $\gamma$ 1         |
| <u>CTGAGGTGATTACTCTGAGGTAAG</u><br>CTGAGGTGATTACTCTGAGGTAAG...TACTCATAGGGAAGCTGGGATAA<br><u>TACTCATAGGGAAGCTGGGATAA</u>           | S $\mu$<br>#5 Large insertion (31 bp)<br>S $\gamma$ 1   |
| <u>TCATTAATCTAGGTTGAATAGAGCT</u><br>TCATTAATCTAGGTTGAATAGAGCTGATGGTATAGGTGACAGGATGGGGG<br><u>GCTGGTATAGGTGACAGGATGGGGG</u>        | S $\mu$<br>#6 Perfectly matched<br>S $\gamma$ 1         |
| <u>CATTAATCTAGGTTGAATAGAGCTA</u><br>CATTAATCTAGGTTGAATAGAGCTAGGTTAGGTGGTATAGGTGACAGGAT<br><u>AGCTTAGCTGGTATAGGTGACAGGAT</u>       | S $\mu$<br>#7 Short homology (1-5 bp)<br>S $\gamma$ 1   |
| <u>GCCTACACTGGACTGTTCTGAGCTG</u><br>GCCTACACTGGACTGTTCTGAGCTGGTATAGGTGACAGGATGGGGGATAA<br><u>AGCTGGTATAGGTGACAGGATGGGGGATAA</u>   | S $\mu$<br>#8 Short homology (1-5 bp)<br>S $\gamma$ 1   |
| <u>GCTGAGATGAGCTGGGGTGAGCTCA</u><br>GCTGAGATGAGCTGGGGTGAGCTCATTAGATGGTATAGGTGACAGGATGG<br><u>TTAGCTGGTATAGGTGACAGGATGG</u>        | S $\mu$<br>#9 Perfectly matched<br>S $\gamma$ 1         |
| <u>GAGCTAAACTCTACTGCCTACACTG</u><br>GAGCTAAACTCTACTGCCTACACTGAGTGTCTTTAGAGAACTGAGGCAA<br><u>TGAGTGTCTTTAGAGAACTGAGGCAA</u>        | S $\mu$<br>#10 Short homology (1-5 bp)<br>S $\gamma$ 1  |
| <u>AGATGAGCTGGGGTGAGCTCAGCTA</u><br>AGATGAGCTGGGGTGAGCTCAGCTA...AGTGGGAGTGCAGAGATCCAAG<br><u>AGTGGGAGTGCAGAGATCCAAG</u>           | S $\mu$<br>#11 Large insertion (59 bp)<br>S $\gamma$ 1  |
| <u>ACTCTGGAGTAGCTGAGATGGGGTG</u><br>ACTCTGGAGTAGCTGACATGGGGTGGTATAGGTGACAGGATGGGGGATAA<br><u>GTATAGGTGACAGGATGGGGGATAA</u>        | S $\mu$<br>#12 Perfectly matched<br>S $\gamma$ 1        |

| Sequence                                                        | Junction                    |
|-----------------------------------------------------------------|-----------------------------|
| <u>GGAGTAGCTGAGATGGGGTGAGATG</u>                                | S <sub>μ</sub>              |
| GGAGTAGCTGAGATGGGGTGAGAT <u>GAGAAACTGAGGCAAGTGGGAGTGCA</u>      | #13 Short homology (1-5 bp) |
|                                                                 | S <sub>γ1</sub>             |
| <u>AGCTCAGCTATGCTACGCTGTGTTG</u>                                | S <sub>μ</sub>              |
| AGCTCAGCTATGCTACGCTGTGTTG <u>ATGAGGCAGGTAAGAGTGTGGGAAC</u>      | #14 Short homology (1-5 bp) |
|                                                                 | S <sub>γ1</sub>             |
| <u>GTGAGCTGGACTGAGCTGGGGTGAG</u>                                | S <sub>μ</sub>              |
| GTGAGCTGGG <u>GCTGAGCTGGGGTGAGAGTACGGGTACACAGCTGAGCAAA</u>      | #15 Short homology (1-5 bp) |
|                                                                 | S <sub>γ1</sub>             |
| <u>GTGAGCTGGGCTGAGCTGGGGTGAGAGTACGGGTACACAGCTGAGCAAA</u>        |                             |
| <u>GTGAGCTGGGCTGAGCTGGGGTGAGAGTACGGGTACACAGCTGAGCAAA</u>        |                             |
| <u>GCTGGGGTGAGCTGAGCTGAGCTGG</u>                                | S <sub>μ</sub>              |
| GCTGGGGTGAGCTGAGCTGAGCT <u>GAGCTGGACCTAGTGGGGGTGTGGGAGACCTG</u> | #16 Short homology (1-5 bp) |
|                                                                 | S <sub>γ1</sub>             |
| <u>GCTGGGGTGAGCTGAGCTGAGCTGGACCTAGTGGGGGTGTGGGAGACCTG</u>       |                             |
| <u>CCAGCCACAGTAATGACCCAGACA</u>                                 | S <sub>μ</sub>              |
| CCAGCCACAGTAATGACCCAGACAC <u>CTAGGGCAGCCAGGAGAAATGGAAGA</u>     | #17 Insertion (1 bp)        |
|                                                                 | S <sub>γ1</sub>             |
| <u>CCAGCCACAGTAATGACCCAGACACTAGGGCAGCCAGGAGAAATGGAAGA</u>       |                             |
| <u>CCAGCCACAGTAATGACCCAGACACTAGGGCAGCCAGGAGAAATGGAAGA</u>       |                             |
| <u>ACAGAGAAGGCCAGACTCATAAAGC</u>                                | S <sub>μ</sub>              |
| ACAGAGAA <u>AGCCAGACTCATAAAGC</u> GCTGGTATAGGTGACAGGATGGGGG     | #18 Perfectly matched       |
|                                                                 | S <sub>γ1</sub>             |
| <u>ACAGAGAAAGCCAGACTCATAAAGCGCTGGTATAGGTGACAGGATGGGGG</u>       |                             |
| <u>ACAGAGAAAGCCAGACTCATAAAGCGCTGGTATAGGTGACAGGATGGGGG</u>       |                             |
| <u>CCCAGACAGAGAAGGCCAGACTCAT</u>                                | S <sub>μ</sub>              |
| CCCAGACA <u>AGAAGGCCAGACTCAT</u> GAGGTCCAGTTGAGTGTCTTTAGAG      | #19 Perfectly matched       |
|                                                                 | S <sub>γ1</sub>             |
| <u>CCCAGACAAGAAGGCCAGACTCATGAGGTCCAGTTGAGTGTCTTTAGAG</u>        |                             |
| <u>CCCAGACAAGAAGGCCAGACTCATGAGGTCCAGTTGAGTGTCTTTAGAG</u>        |                             |
| <u>GGACTGAGCTGAGCTAGGGTGAGCT</u>                                | S <sub>μ</sub>              |
| <u>AGACTGAGCTGAGCTAGGGTGAGCTA</u> ATACATGAGAGCTGGAGCTAGTAT      | #20 Short homology (1-5 bp) |
|                                                                 | S <sub>γ1</sub>             |
| <u>AGACTGAGCTGAGCTAGGGTGAGCTAATACATGAGAGCTGGAGCTAGTAT</u>       |                             |
| <u>AGACTGAGCTGAGCTAGGGTGAGCTAATACATGAGAGCTGGAGCTAGTAT</u>       |                             |
| <u>GAAGGCCAGACTCATAAAGCTTGCT</u>                                | S <sub>μ</sub>              |
| GAA <u>AGCCAGACTCATAAAGCTTT</u> CTCAGTCAAAAAACCACAGAAGAGCAGG    | #21 Perfectly matched       |
|                                                                 | S <sub>γ1</sub>             |
| <u>GAAAGCCAGACTCATAAAGCTTTCTCAGTCAAAAAACCACAGAAGAGCAGG</u>      |                             |
| <u>GAAAGCCAGACTCATAAAGCTTTCTCAGTCAAAAAACCACAGAAGAGCAGG</u>      |                             |
| <u>AGGTTGAGAGCCCTAGTAAGCGAGG</u>                                | S <sub>μ</sub>              |
| AGGTTGAGAGCCCTAGTAAGCGAGGGGATTCTAAGCAGTCACAGAGAAGC              | #22 Short homology (1-5 bp) |
|                                                                 | S <sub>γ1</sub>             |
| <u>AGGTTGAGAGCCCTAGTAAGCGAGGGGATTCTAAGCAGTCACAGAGAAGC</u>       |                             |
| <u>AGGTTGAGAGCCCTAGTAAGCGAGGGGATTCTAAGCAGTCACAGAGAAGC</u>       |                             |
| <u>TAATGAACTGGAATGAGCTGGGCC</u>                                 | S <sub>μ</sub>              |
| TAATGAACTGGAATGAGCTGGGCC <u>AGAAGGT</u> GAGGCAGGTAAGAGTGTGG     | #23 Insertion (2 bp)        |
|                                                                 | S <sub>γ1</sub>             |
| <u>TAATGAACTGGAATGAGCTGGGCCAGAAGGTGAGGCAGGTAAGAGTGTGG</u>       |                             |
| <u>TAATGAACTGGAATGAGCTGGGCCAGAAGGTGAGGCAGGTAAGAGTGTGG</u>       |                             |
| <u>TGGGTGGGCTTCTCTGAGCGCTTCTA</u>                               | S <sub>μ</sub>              |
| TGGGTGGGCTTCTCTGAG <u>TGCTTCTACAGGTAAGCAGGGACAGGTGGAAG</u>      | #24 Short homology (1-5 bp) |
|                                                                 | S <sub>γ1</sub>             |
| <u>TGGGTGGGCTTCTCTGAGTGCTTCTACAGGTAAGCAGGGACAGGTGGAAG</u>       |                             |
| <u>TGGGTGGGCTTCTCTGAGTGCTTCTACAGGTAAGCAGGGACAGGTGGAAG</u>       |                             |
| <u>CGCTAAGCTAAACTAGGCTGGCTTA</u>                                | S <sub>μ</sub>              |
| CGCTAAGCTAAACTAGGCTGGCTTA . . .AGCTGGAGCTGATGGGTGTATA           | #25 Large insertion (34 bp) |
|                                                                 | S <sub>γ1</sub>             |
| <u>CGCTAAGCTAAACTAGGCTGGCTTA . . .AGCTGGAGCTGATGGGTGTATA</u>    |                             |
| <u>CGCTAAGCTAAACTAGGCTGGCTTA . . .AGCTGGAGCTGATGGGTGTATA</u>    |                             |
| <u>GCTTCTAAAATGCGCTAAAAGT</u>                                   | S <sub>μ</sub>              |
| GCTTCTAAAATGCGCTAAAAGT <u>GAGGCAAATACTACATAGCTGGAGCTGAT</u>     | #26 Perfectly matched       |
|                                                                 | S <sub>γ1</sub>             |
| <u>GCTTCTAAAATGCGCTAAAAGTGAGGCAAATACTACATAGCTGGAGCTGAT</u>      |                             |
| <u>GCTTCTAAAATGCGCTAAAAGTGAGGCAAATACTACATAGCTGGAGCTGAT</u>      |                             |
| <u>ATTAATCTAGGTTGAATAGAGCTAA</u>                                | S <sub>μ</sub>              |
| ATTAATCTAGGTTGAATAGAGCT <u>GATGGTATAGGTGACAGGATGGGGGAT</u>      | #27 Perfectly matched       |
|                                                                 | S <sub>γ1</sub>             |
| <u>ATTAATCTAGGTTGAATAGAGCTGATGGTATAGGTGACAGGATGGGGGAT</u>       |                             |
| <u>ATTAATCTAGGTTGAATAGAGCTGATGGTATAGGTGACAGGATGGGGGAT</u>       |                             |
| <u>GGAATGAGCTGGGCCGCTAAGCTAA</u>                                | S <sub>μ</sub>              |
| GGAATGAGCTGGGCCGCTAAGCTAA <u>CTAAGGATCAGGGATAGACATGTAA</u>      | #28 Short homology (1-5 bp) |
|                                                                 | S <sub>γ1</sub>             |
| <u>GGAATGAGCTGGGCCGCTAAGCTAACTAAGGATCAGGGATAGACATGTAA</u>       |                             |
| <u>GGAATGAGCTGGGCCGCTAAGCTAACTAAGGATCAGGGATAGACATGTAA</u>       |                             |

| Sequence                                                                                                                 | Junction                                                          |
|--------------------------------------------------------------------------------------------------------------------------|-------------------------------------------------------------------|
| <u>GCTTCTAAAATGCGCTAAACTGAGG</u><br>GCTTCTAAAATGCGCTAAACTGAGG . . . GCAGTCACAGAGAAGCTGATCC<br>GCAGTCACAGAGAACTGATCC      | S <sub>μ</sub><br>#29 Large insertion (124 bp)<br>S <sub>γ1</sub> |
| <u>CTGAGATGGGGTGAGATGGGGTGAG</u><br>CTGAGATGGGGTGAGATGGGGTGAGATCCAGGCTGAGCAGCTCCAGCTTA<br>AGATCCAAGCTGAGCAGCTCCAGCTTA    | S <sub>μ</sub><br>#30 Short homology (1-5 bp)<br>S <sub>γ10</sub> |
| <u>AGCTGGGCTGAGCTGGACTGAGCTG</u><br>AGCTGGGCTGAGCTGGACTGAGCTGTAGTTGGG-ATTCTAAGCAGTCACA<br>GTAGTTGGGGATTCTAAGCAGTCACA     | S <sub>μ</sub><br>#31 Short homology (1-5 bp)<br>S <sub>γ1</sub>  |
| <u>CTGGAATGAGCTGGGCCGCTAAGCT</u><br>CTGGAATGAGCTGGGCCGCTAAGCT . . . GTAACCTGGACCTAGTGGGGGT<br>GTAACCTGGAGCTAGTGGGGGT     | S <sub>μ</sub><br>#32 Large insertion (64bp)<br>S <sub>γ1</sub>   |
| <u>CGCTAAGCTAAACTAGGCTGGCTTA</u><br>CGCTAAGCTAAACTAGGCTGACTTAGGTGCATGCTGGCTACTCATAGGGA<br>GGTGCATGCTGGGTACTCATAGGGA      | S <sub>μ</sub><br>#33 Perfectly matched<br>S <sub>γ1</sub>        |
| <u>GAATGAGCTGGGCCGCTAAGCTAAA</u><br>GAATGAGCTGGGCCGCTAAGCTAAAGGCTGGACTGGGGAGCCAAGGTAGG<br>AAAGGCTGGACTGGGGAGCCAAGGTAGG   | S <sub>μ</sub><br>#34 Short homology (1-5 bp)<br>S <sub>γ1</sub>  |
| <u>AGCTGAGCTGGGGTGAGCTGAGCTG</u><br>AGCTGAGCTGGGGTGAGCTGAGCTGATAAGGTACCAGGCTGAGCAGCTGA<br>ATAAGGTACCAGGCTGAGCAGCTGA      | S <sub>μ</sub><br>#35 Perfectly matched<br>S <sub>γ1</sub>        |
| <u>ACTTCATTAATCTAGGTTGAATAG</u><br>ACTTCATTAATCTAGGTTGAATAGTATACTACATAGCTGGAGCTGATGGC<br>ATACTACATAGCTGGAGCTGATGGG       | S <sub>μ</sub><br>#36 Insertion (1 bp)<br>S <sub>γ1</sub>         |
| <u>TCTAGGTTGAATAGAGCTAAACTCT</u><br>TCTAGGTTGAATAGAGCTAAACTCTGGTCCAGTTGAGTGTCTTTAGAGAA<br>GGTCCAGTTGAGTGTCTTTAGAGAA      | S <sub>μ</sub><br>#37 Perfectly matched<br>S <sub>γ1</sub>        |
| <u>CTAGGTTGAATAGAGCTAAACTCTA</u><br>CTAGGTTGAATAGAGCTAAACTCTATGAGAGCTGGAGCTAGTATGAAGGT<br>ATGAGAGCTGGAGCTAGTATGAAGGT     | S <sub>μ</sub><br>#38 Short homology (1-5 bp)<br>S <sub>γ1</sub>  |
| <u>CTACTGCCTACACTGGACTGTTCTG</u><br>CTACTGCCTACACTGGACTGTTCTGTTAATACATGAGAGCTGGAGCTAGT<br>GCTACTACATGAGAGCTGGAGCTAGT     | S <sub>μ</sub><br>#39 Short homology (1-5 bp)<br>S <sub>γ1</sub>  |
| <u>GAGCTGAGATGAGCTGGGGTGAGCT</u><br>GAGCTGAGATGAGCTGGGGTGAGCT . . . TGGTATAGGTGACAGGATGGGG<br>TGGTATAGGTGACAGGATGGGG     | S <sub>μ</sub><br>#40 Large insertion (36 bp)<br>S <sub>γ1</sub>  |
| <u>TGAGCTCAGCTATGCTACGCTGTGT</u><br>TGAGCTCAGCTATGCTACGCTGTGTATGAAGGTGGAGGTCCAGTTGAGTG<br>GTATGAAGGTGGAGGTCCAGTTGAGTG    | S <sub>μ</sub><br>#41 Short homology (1-5 bp)<br>S <sub>γ1</sub>  |
| <u>GGACTGAGCTGAGCTAGGGTGAGCTG</u><br>GGACTGAGCTGAGCTAGGGTGAGCTGGTATAGGTGACAGGATGGGGGATA<br>AGCTGGTATAGGTGACAGGATGGGGGATA | S <sub>μ</sub><br>#42 Short homology (1-5 bp)<br>S <sub>γ1</sub>  |
| <u>GGTGAGCTGAGCTGGGCTGAGCTGG</u><br>GGTGAGCTGAGCTGGGCTGAGTTAAGCTGAGCAGCTGAAGGTAACCTGGAC<br>GCTGAGCAGCTGAAGGTAACCTGGAG    | S <sub>μ</sub><br>#43 Short homology (1-5 bp)<br>S <sub>γ1</sub>  |
| <u>TGAGCTGAGCTGAGCTTGACTGAGC</u><br>TGAGCTGAGCTGAGCTTGACTGAGC . . . AGTTGATGGCTGTATAAGGTAC<br>AGCTGATGGGTGTATAAGGTAC     | S <sub>μ</sub><br>#44 Large insertion (422 bp)<br>S <sub>γ1</sub> |

| Sequence                                                            | Junction                    |
|---------------------------------------------------------------------|-----------------------------|
| <u>GCTAAGCTGGGGTGAGCTGAGCTGA</u>                                    | S $\mu$                     |
| GCTAAGCTGGGGTGAGCTGAGCTGA . . . <u>TTAGCTGGTATAGGTGACAGGA</u>       | #45 Large insertion (30 bp) |
| <u>TTAGCTGGTATAGGTGACAGGA</u>                                       | S $\gamma$ 1                |
| AAGCTGGGGTGAGCTGAGCTGAGCT                                           | S $\mu$                     |
| <b>G</b> AGCTGGGGTGAGCTGAGCTGAGCT <u>GACCAGT</u> TTAGCTGGTATAGGTGAC | #46 Insertion (2 bp)        |
| <u>CCAGCTTAGCTGGTATAGGTGAC</u>                                      | S $\gamma$ 1                |

*Wt* mice: 21 S<sub>m</sub>-S<sub>d</sub> junctions (obtained after genomic extraction of MLN from 13 mice), 46 S<sub>m</sub>-S<sub>g1</sub> junctions, and 69 S<sub>m</sub>-S<sub>g3</sub> junctions (obtained after in vitro stimulation of splenocytes from 6 mice). 39RR-deficient mice: 35 S<sub>m</sub>-S<sub>d</sub> junctions (obtained after genomic extraction of MLN from 10 mice). Junctional microhomology sequences and insertions are underlined in black. Mutations are in bold letters. \*, Junction #35 contain a deletion of 125bps in S $\mu$ .
